# Supplementary material for: Sesquiterpenes Are Agonists of the Pregnane X Receptor but Do Not Induce the Expression of Phase I Drug-Metabolizing Enzymes in the Human Liver
Source: MDPI journal article supplement (doi:10.3390/ijms20184562), 2019-09-14
Supplement: s1 [file s1]

## Supplementary

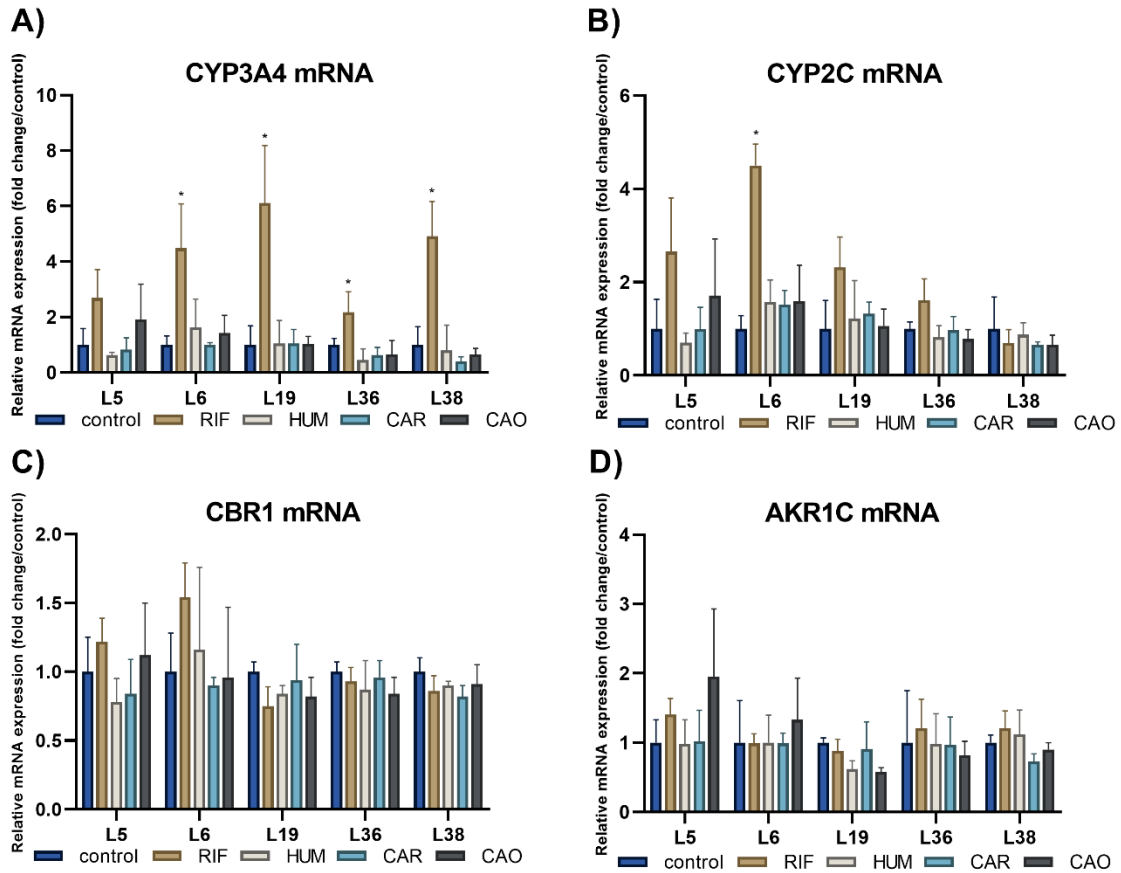

**Figure S1.** Inter-individual differences in the effect of cyclic sesquiterpenes (10  $\mu$ M) and RIF (10  $\mu$ M) on the normalized mRNA expression of CYP3A4 (A), CYP2C (B), CBR1 (C) and AKR1C (D) in human PCLS from five patients after 24 h ( $n = 3$ ). The normalized expression level was calculated using the  $2^{-\Delta\Delta C_t}$  method with the geometric mean of GAPDH and SDHA as a reference gene. Results are presented as the mean  $\pm$  SD ( $n = 3$ ). Statistical analyses were performed using one-way ANOVA with Dunnett's test:  $p < 0.05$  (\*).

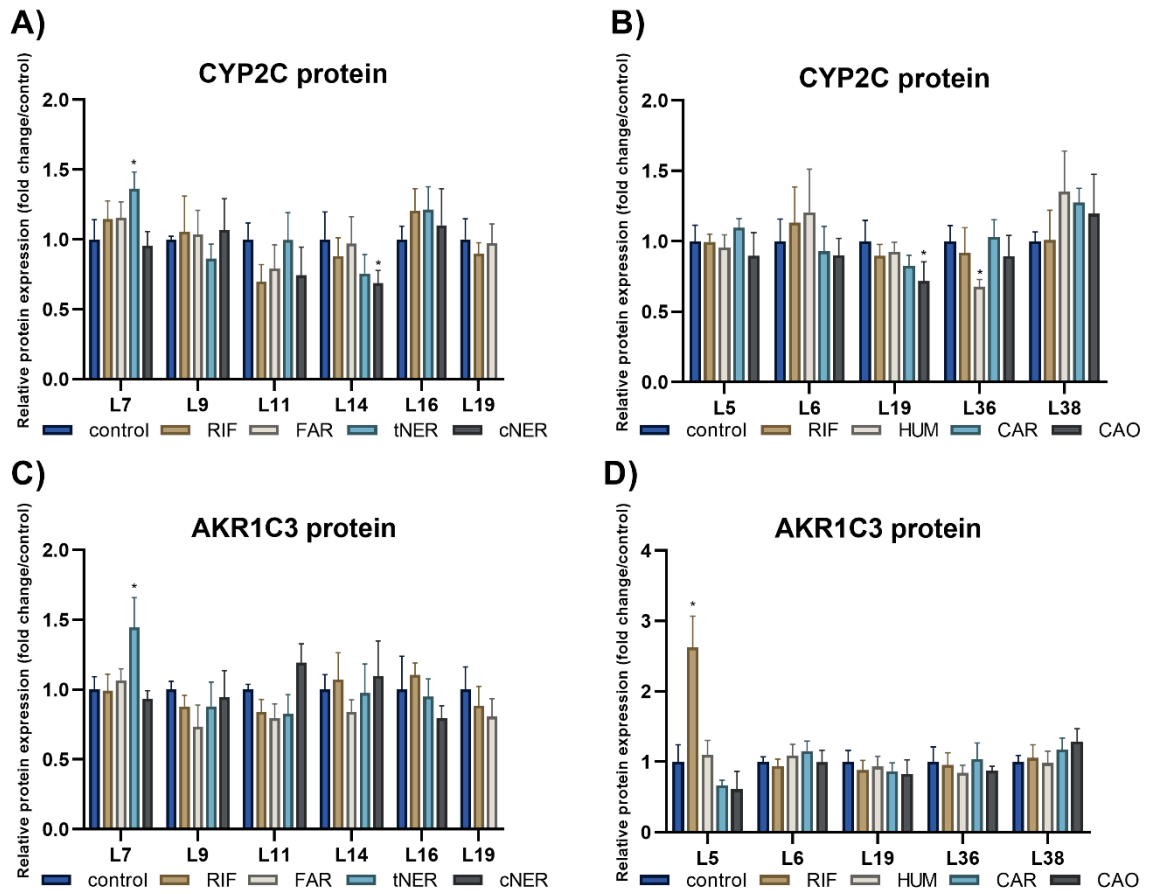

**Figure S2.** Inter-individual differences in the effect of sesquiterpenes (10  $\mu$ M) and RIF (10  $\mu$ M) on the normalized protein expression of CYP2C (A, B) and AKR1C3 (C, D) in human PCLS from ten patients after 24 h ( $n = 3$ ). The protein expression was calculated using calnexin as a loading control. Results are presented as the mean  $\pm$  SD ( $n = 4$ ), with controls set to 100%. Statistical analyses were performed using one-way ANOVA with Dunnett's test:  $p < 0.05$  (\*).
